# Supplementary material
Source: PubMed Central journal article supplement (PMC7499236)

## Supplementary Online Content

Sridhar SS, Blais N, Tran B, et al. Efficacy and safety of nab-paclitaxel vs paclitaxel on survival in patients with platinum-refractory metastatic urothelial cancer: the Canadian Cancer Trials Group BL.12 randomized clinical trial. *JAMA Oncol*. Published online September 17, 2020. doi:10.1001/jamaoncol.2020.3927

**eTable 1.** Reason for Treatment Discontinuation n (%)

**eTable 2.**  $\geq$  Grade 3 Hematologic Toxicities in Both Arms

**eFigure 1A.** Overall Survival in the nab-Paclitaxel and Paclitaxel Arms

**eFigure 1B.** Overall Survival Forest Plot

This supplementary material has been provided by the authors to give readers additional information about their work.

eTable 1: Reason for Treatment Discontinuation n (%)

| <b>Reasons Off Protocol Therapy</b> | <b>nab-Paclitaxel<br/>(n=96)<br/>n (%)</b> | <b>Paclitaxel<br/>(n=91)<br/>n (%)</b> |
|-------------------------------------|--------------------------------------------|----------------------------------------|
| <b>Death Due to Disease</b>         | <b>2 (2)</b>                               | <b>1 (1)</b>                           |
| <b>Intercurrent Illness</b>         | <b>1 (1)</b>                               | <b>4 (4)</b>                           |
| <b>Progressive Disease</b>          | <b>50 (52)</b>                             | <b>50 (50)</b>                         |
| <b>Adverse related events</b>       | <b>27 (27)</b>                             | <b>18 (18)</b>                         |
| <b>Patient Refusal</b>              | <b>5 (5)</b>                               | <b>7 (7)</b>                           |
| <b>Symptomatic Progression</b>      | <b>10 (10)</b>                             | <b>7 (7)</b>                           |
| <b>Other</b>                        | <b>1(1)</b>                                | <b>4 (4)</b>                           |

eTable 2: ≥ Grade 3 Hematologic Toxicities in Both Arms

| <b>Hematologic Toxicities<br/>(CTCAE Version 4)</b> | <b>nab-Paclitaxel<br/>n (%)</b> | <b>Paclitaxel<br/>n (%)</b> |
|-----------------------------------------------------|---------------------------------|-----------------------------|
| <b>Neutropenia</b>                                  | <b>13 (13)</b>                  | <b>7 (7)</b>                |
| <b>Anemia</b>                                       | <b>3 (3)</b>                    | <b>7 (7)</b>                |
| <b>Thrombocytopenia</b>                             | <b>1 (1)</b>                    | <b>4 (2)</b>                |

# NCIC CTG TRIAL BL.12

eFigure 1A. Overall Survival in the nab-Paclitaxel and Paclitaxel Arms

## Overall Survival

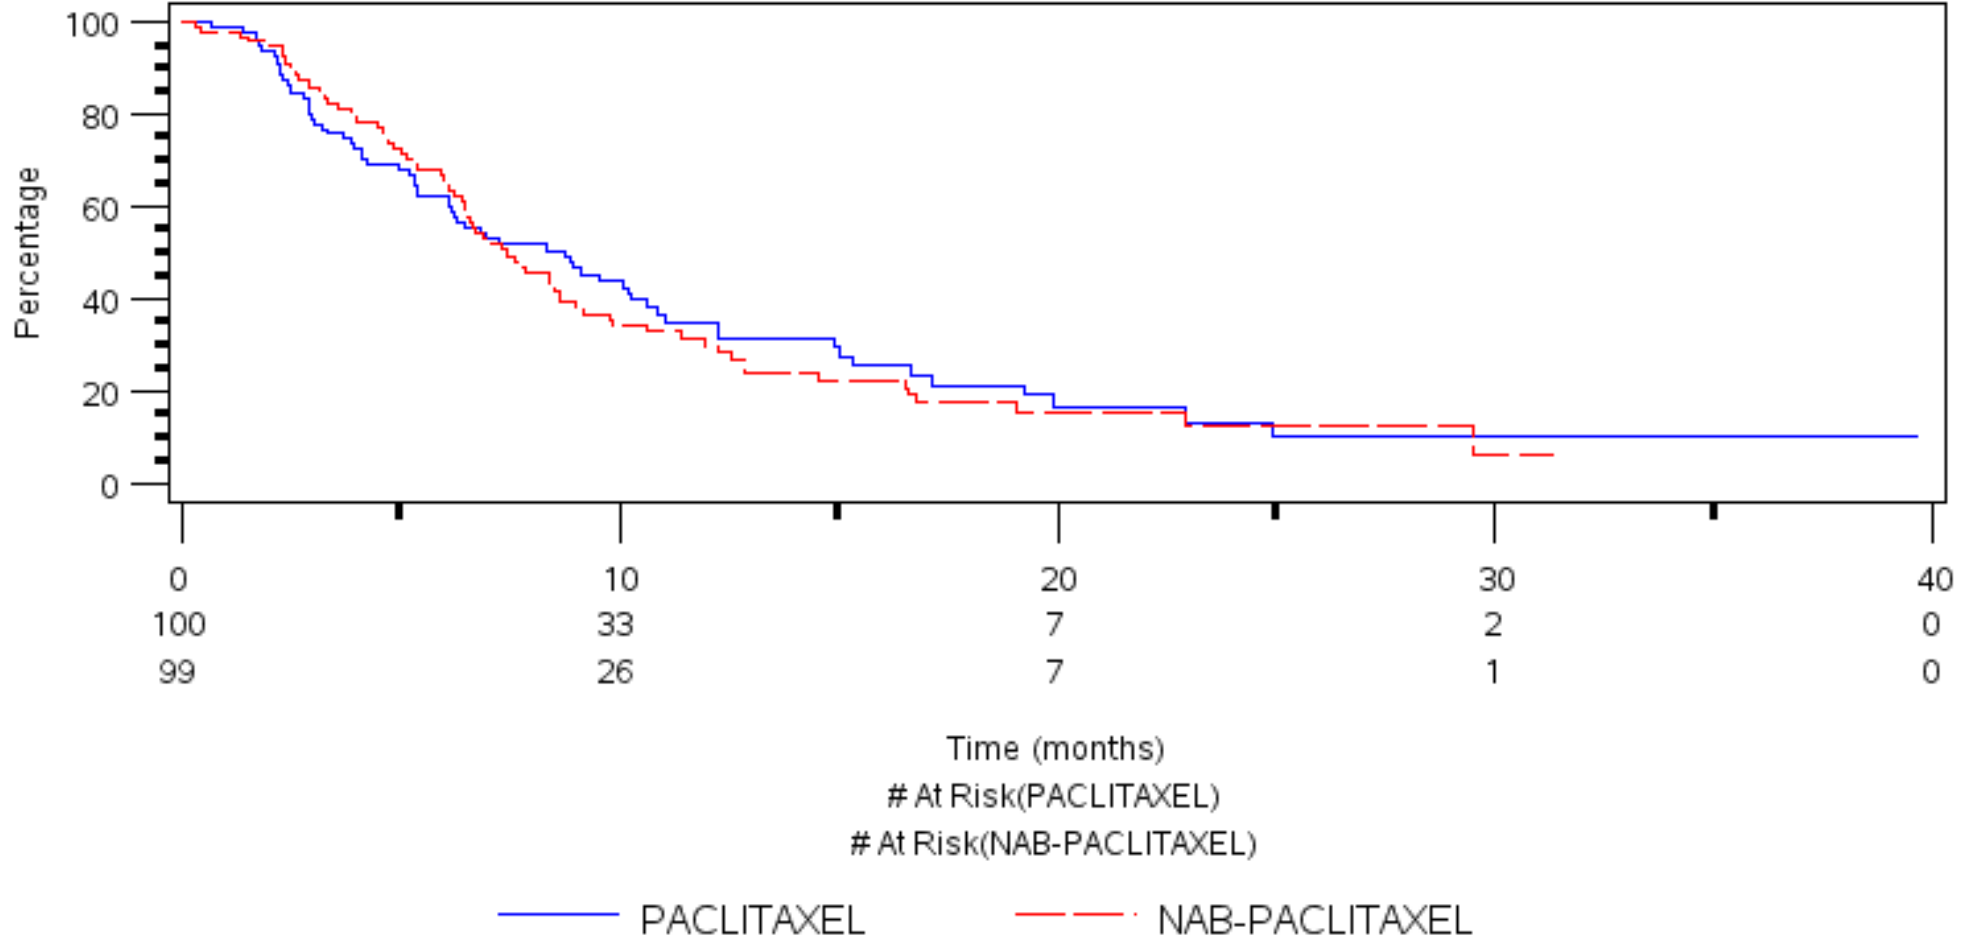

### SUMMARY STATISTICS:

Log-Rank test for equality of groups:  $p=0.7585$

Stratified Log Rank test:  $p=0.7952$

Median for PACLITAXEL: 8.77 -90% C.I. (6.11 ,10.61 )

Median for NAB-PACLITAXEL: 7.46 -90% C.I. (6.44 ,8.64 )

Survival rate at 0 months for PACLITAXEL: 100% - 90% C.I. (100%, 100%)

Survival rate at 0 months for NAB-PACLITAXEL: 100% - 90% C.I. (100%, 100%)

Stratified Hazard Ratio of NAB-PACLITAXEL/PACLITAXEL: 0.952 - 90 % C.I. (0.695, 1.303)

eFigure 1B. Overall Survival Forest Plot

### Treatment Effect on Overall Survival by Factors

Hazard Ratio and 95% CL

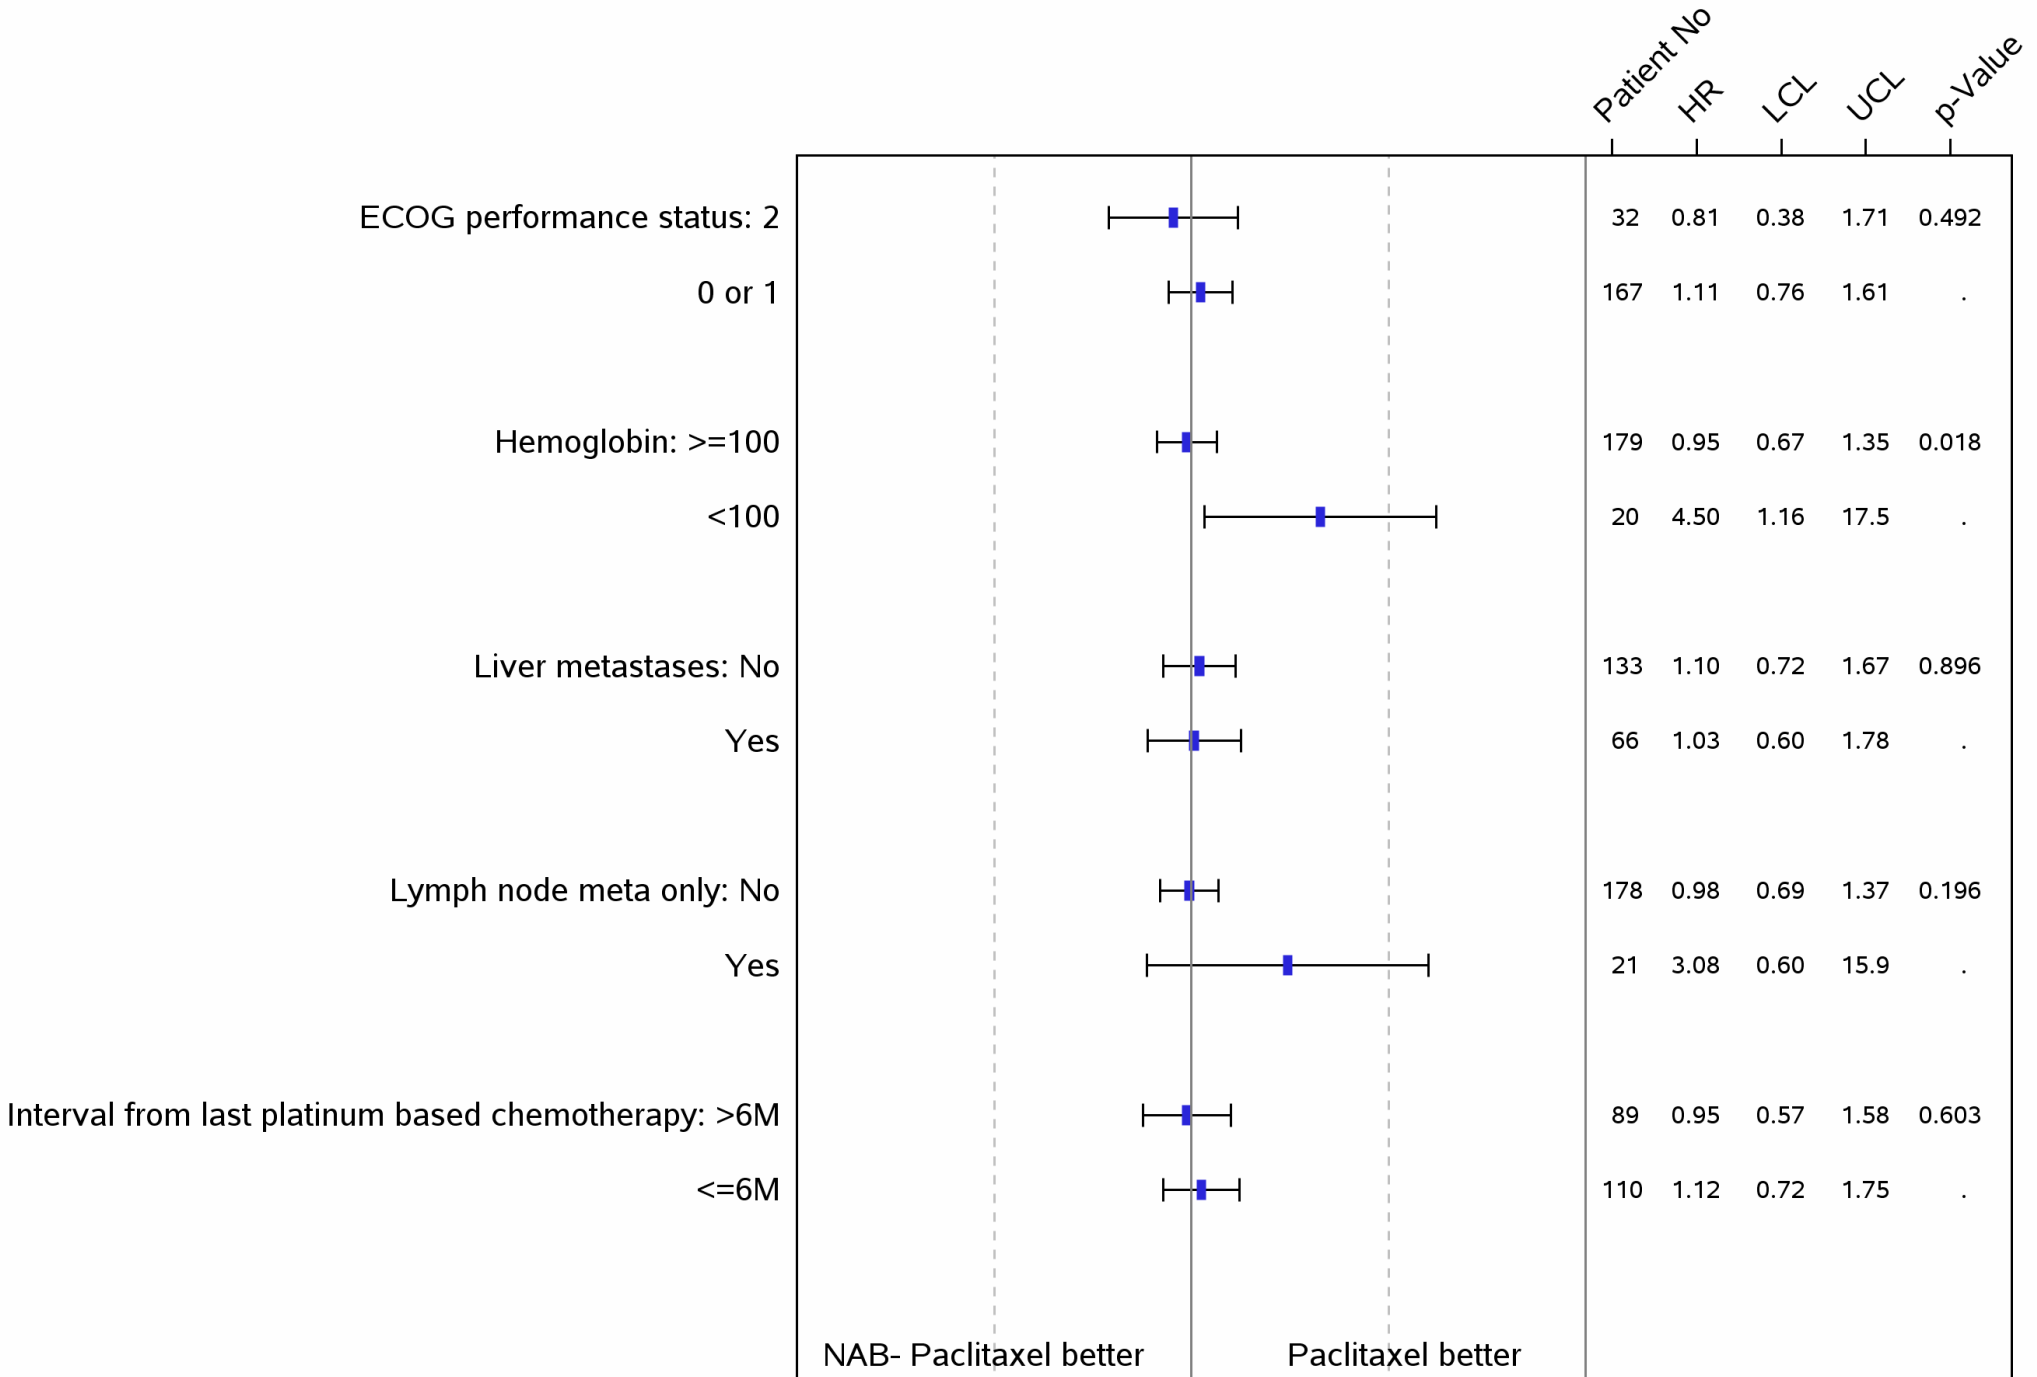

Supplement: jamaoncol-e203927-s002.pdf [file jamaoncol-e203927-s002.pdf]
