# Supplementary material
Source: PubMed Central journal article supplement (PMC7499236)
Supplement: jamaoncol-e203927-s003.pdf [file jamaoncol-e203927-s003.pdf]

## Data Sharing Statement

Sridhar. Efficacy and Safety of nab-Paclitaxel vs Paclitaxel on Survival in Patients With Platinum-Refractory Metastatic Urothelial Cancer.

*JAMA Oncol.* Published September 17, 2020.

10.1001/jamaoncol.2020.3927

### Data

**Data available:** Yes

**Data types:** Other (please specify)

**Additional Information:** The data that support the findings of this study are available from the Canadian Cancer Trials Group upon reasonable request. Restrictions may apply.

**How to access data:** Contact [datasharing@ctg.queensu.ca](mailto:datasharing@ctg.queensu.ca) or see [www.ctg.queensu.ca](http://www.ctg.queensu.ca)

**When available:** With publication

### Supporting Documents

**Document types:** None

### Additional Information

**Who can access the data:** The data that support the findings of this study are available from the Canadian Cancer Trials Group upon reasonable request. Restrictions may apply.

**Types of analyses:** The data that support the findings of this study are available from the Canadian Cancer Trials Group upon reasonable request. Restrictions may apply.

**Mechanisms of data availability:** The data that support the findings of this study are available from the Canadian Cancer Trials Group upon reasonable request. Restrictions may apply. Contact [datasharing@ctg.queensu.ca](mailto:datasharing@ctg.queensu.ca) or see [www.ctg.queensu.ca](http://www.ctg.queensu.ca)
